# Supplementary material for: Aggressiveness in Italian Children with ADHD: MAOA Gene Polymorphism Involvement
Source: MDPI journal article supplement (doi:10.3390/diseases12040070), 2024-03-31
Supplement: s1 [file s1]

**Table S1. Descriptive statistics of Conner's Rating Scales completed by caregivers. Means (and Standard Deviations) of the ADHD subscales: (A) ADHD index, Inattention and Hyperactivity and (B) Defiance/Aggression in the total sample, boys and girls.**

**A**

| <b>SUBSCALE</b> | <b>TOTAL SAMPLE (n=80)</b> | <b>BOYS (n=74)</b> | <b>GIRLS (n=6)</b> |
|-----------------|----------------------------|--------------------|--------------------|
| ADHD index      | 75,017 (15,817)            | 74,111 (15,773)    | 90,250 (15,909)    |
| Inattention     | 70,682 (11,796)            | 70,639 (12,102)    | 71,200 ( 7,981)    |
| Hyperactivity   | 71,162 (13,276)            | 70,344 (13,264)    | 77,500 (12,629)    |

**B**

| <b>SUBSCALE</b>                              | <b>TOTAL SAMPLE (n=80)</b> | <b>BOYS (n=74)</b> | <b>GIRLS (n=6)</b> |
|----------------------------------------------|----------------------------|--------------------|--------------------|
| Defiance/Aggression<br>(All patients)        | 70,394 (23,685)            | 69,820 (23,918)    | 77,400 (21,640)    |
| <b>SUBSCALE</b>                              | <b>TOTAL SAMPLE (n=32)</b> | <b>BOYS (n=28)</b> | <b>GIRLS (n=4)</b> |
| Defiance/Aggression<br>(Aggressive patients) | 89,156 (20,453)            | 90,071 (20,620)    | 82,750 (21,640)    |

*All the numbers are T scores*
